# Supplementary material for: Trash into treasure: stiff, thermally insulating and highly conductive carbon aerogels from leather wastes for high-performance electromagnetic interference shielding
Source: Royal Society of Chemistry journal article supplement (doi:10.1039/d0tc05480a), 2021-01-01
Supplement: d0tc05480a1.pdf [file d0tc05480a1.pdf]

## Supplementary Information

### **Trash into Treasure: stiff, thermally insulating and highly conductive carbon aerogels from leather wastes for high- performance electromagnetic interference shielding**

Bin Yuan<sup>1‡</sup>, Shuangxin Lai<sup>1‡</sup>, Jianjun Li<sup>2</sup>, Li Li<sup>1</sup>, and Shibing Bai<sup>1\*</sup>

<sup>1</sup> State Key Laboratory of Polymer Materials Engineering, Polymer Research Institute of Sichuan University, Chengdu 610065, China

<sup>2</sup> Kingfa Sci. and Tech. Co., Ltd, Guangzhou 510663, China

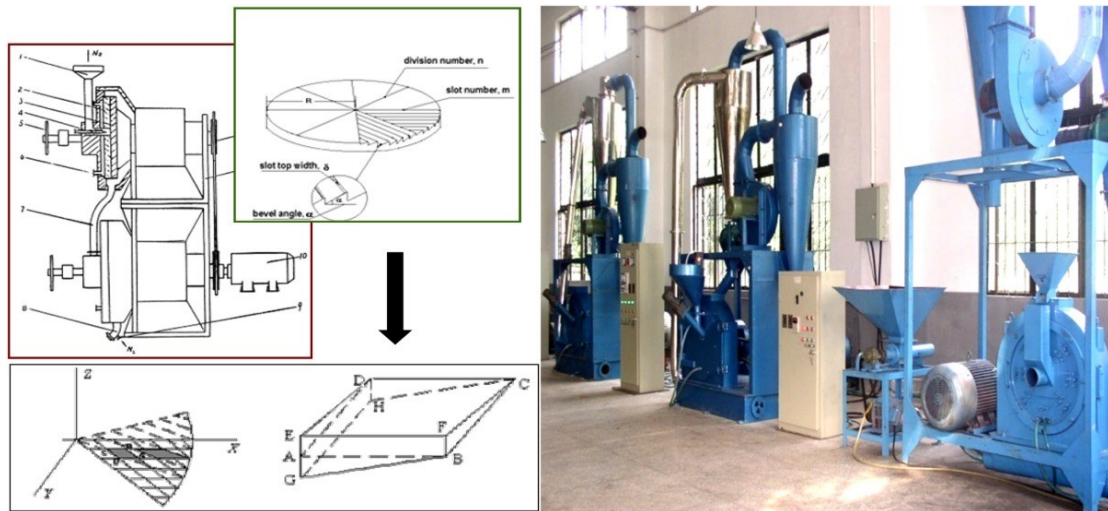

(a)

(b)

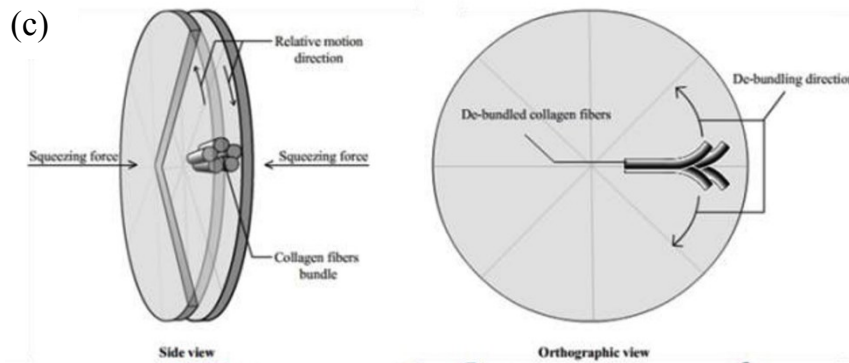

Fig.S1 Schematic diagram of S<sup>3</sup>M reactor (a) and the photograph of S<sup>3</sup>M equipment<sup>1</sup>. (c) is the failure mechanism of leather fiber in S<sup>3</sup>M reactor<sup>2</sup>.

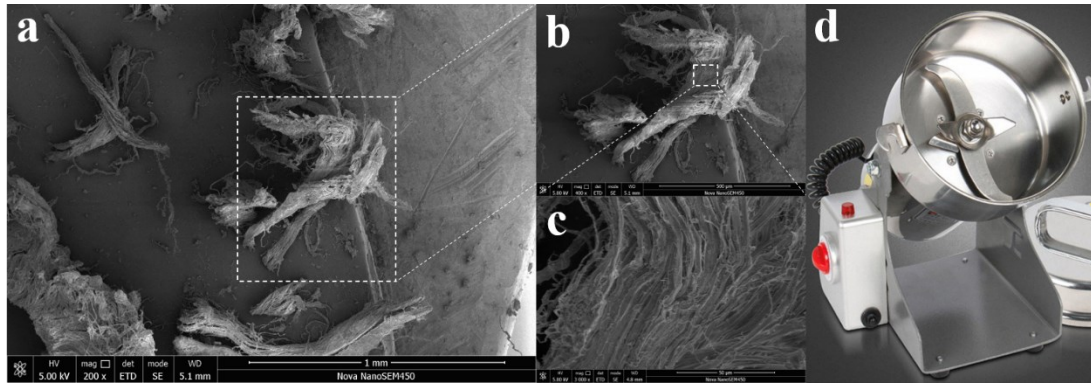

Fig.S2 SEM photos of LWs broken by high-speed crusher (a,b,c); the digital photo of high-speed crusherd (d).

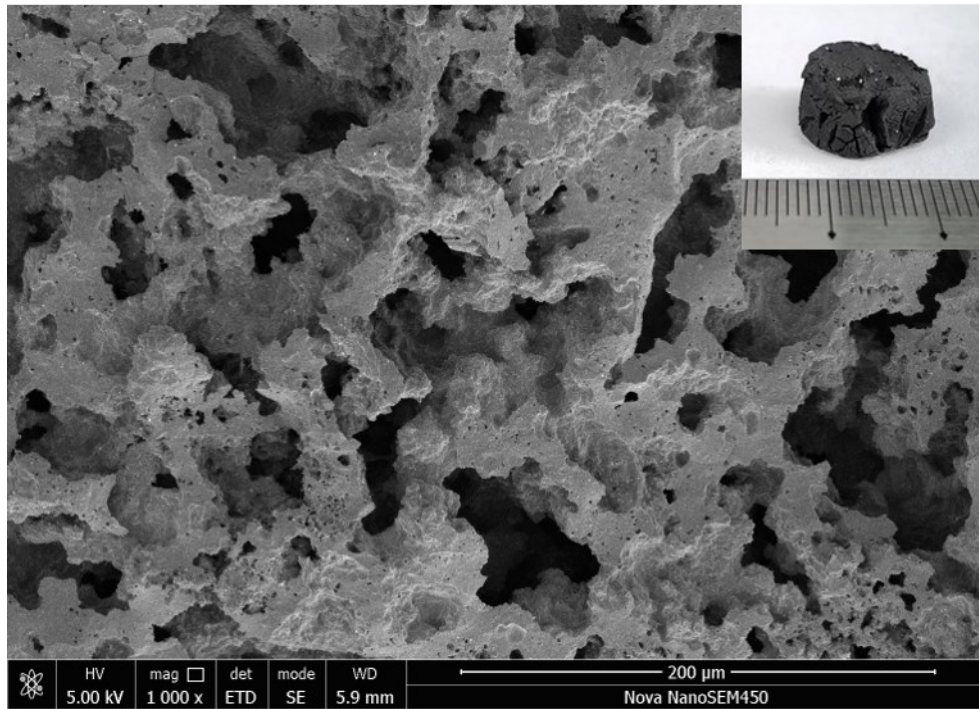

Fig.S3 SEM image and actual photo of 2LWs-3PVA CAs

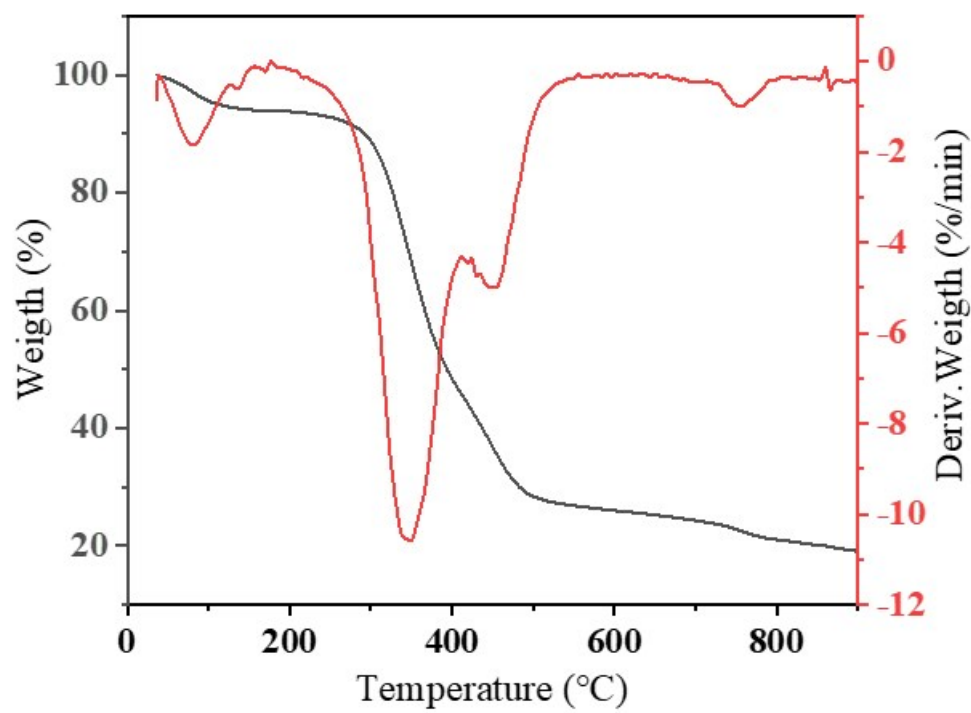

Fig.S4 TG/DTG image corresponding to the TG-IR in Figure.4a.

**Eq.S1:**

The porosity (P) is calculated using the following equation:

$$P = \left(1 - \frac{\rho_0}{\rho}\right) \times 100\%$$

Where  $\rho_0$  is the bulk density and  $\rho$  is the skeletal density of the prepared CAs.

**Eq.S2:**

$$\delta = (\sqrt{\pi\mu f\sigma})^{-1}$$

Here,  $f$  is the frequency,  $\sigma$  is the electrical conductivity,  $\mu$  is the magnetic permeability of CAs ( $\mu = \mu_0\mu_r$ ,  $\mu_0=4\pi\times 10^{-7}$  H/m,  $\mu_r$  is the relative permeability of the material,  $\mu_r=1$  for the nonmagnetic CAs).

Tab.S1 The main components of liquid products during pyrolysis.

| Peak Area (%) | Compounds Name                               | Similarity Index |
|---------------|----------------------------------------------|------------------|
| 26.82         | Acetic acid                                  | 97               |
| 14.91         | Acetamide                                    | 97               |
| 5.35          | Carbamic acid, methyl-, 3-methylphenyl ester | 73               |
| 4.74          | N-methyl-acetamid                            | 80               |
| 3.95          | 2-Piperidinone                               | 84               |
| 3.77          | Phenol                                       | 93               |
| 3.42          | 1H-pyrrole-2-carbonitrile                    | 88               |
| 3.14          | Propanamide                                  | 92               |

Tab.S2 EDS analysis of elemental composition and content before and after pyrolysis

| Elements | Proportion before<br>pyrolysis (wt%) | Proportion after pyrolysis<br>(wt%) |
|----------|--------------------------------------|-------------------------------------|
| C        | 49.47                                | 64.78                               |
| O        | 19.75                                | 10.95                               |
| N        | 14.85                                | 4.01                                |
| S        | 0.93                                 | 3.32                                |
| Na       | 2.44                                 | 6.56                                |
| Ca       | 0.21                                 | 1.52                                |
| Cr       | 5.3                                  | 2.97                                |
| Cl       | 7.05                                 | 5.89                                |



Tab.S3 Comparison of TASSE of various carbon-based materials

| Carbon materials                              | TASSE<br>(dB cm <sup>2</sup> g <sup>-1</sup> ) | Frequency       | References |
|-----------------------------------------------|------------------------------------------------|-----------------|------------|
| Aerogel-like carbon from sugarcane            | 421.49                                         | 8.2-12.4 GHz    | 3          |
| Carbon foam from sucrose and carbon nanotube  | 339.10                                         | 8.2-12.4 GHz    | 4          |
| Carbon Foam Derived from Bread                | 16                                             | 6.0-12.4 GHz    | 5          |
| Resorcinol-formaldehyde based carbon aerogels | 526                                            | 8.2-12.4 GHz    | 6          |
| Microcellular carbon foams from sucrose       | 389.43                                         | 8.2-12.4GHz     | 7          |
| Porous graphene/polystyrene composites        | 256.7                                          | 8.2 GHz-12.4GHz | 8          |
| This work                                     | 605.85                                         | 8.2 GHz-12.4GHz |            |

## References

1. S. Q. Yang, S. B. Bai and Q. Wang, *J. Appl. Polym. Sci.*, 2015, **132**, 42494.
2. B. H. Liu, Y. J. Li, Q. Wang and S. B. Bai, *Compos. Sci. Technol.*, 2019, **181**.
3. Y. Q. Li, Y. A. Samad, K. Polychronopoulou and K. Liao, *Acs Sustainable Chemistry & Engineering*, 2015, **3**, 1419-1427.
4. R. Narasimman, S. Vijayan, K. S. Dijith, K. P. Surendran and K. Prabhakaran, *Mater. Chem. Phys.*, 2016, **181**, 538-548.
5. Y. Yuan, Y. Ding, C. Wang, F. Xu, Z. Lin, Y. Qin, Y. Li, M. Yang, X. He, Q. Peng and Y. Li, *ACS Applied Materials & Interfaces*, 2016, **8**, 16852-16861.
6. A. A. Mahani, S. Motahari and V. Nayyeri, *Mater. Chem. Phys.*, 2018, **213**, 492-501.
7. P. Wilson, S. Vijayan and K. Prabhakaran, *Materials & Design*, 2018, **139**, 25-35.
8. D.-X. Yan, P.-G. Ren, H. Pang, Q. Fu, M.-B. Yang and Z.-M. Li, *J. Mater. Chem.*, 2012, **22**.
